# Supplementary material
Source: PubMed Central journal article supplement (PMC5577966)
Supplement: supp_WNL.0000000000004292_Table_e-1.pdf [file supp_WNL.0000000000004292_Table_e-1.pdf]

Supplemental table e-1. Comparison of Cases

| Cause of Death<br>Epileptologists | Cause of Death<br>POST SCD                                | Race     | Age | Gender | Antiseizure<br>Drugs  | Toxicology                                                                                                                                                                               | Medical Co-<br>morbidities                                                                     |
|-----------------------------------|-----------------------------------------------------------|----------|-----|--------|-----------------------|------------------------------------------------------------------------------------------------------------------------------------------------------------------------------------------|------------------------------------------------------------------------------------------------|
| SUDEP                             | SUDEP                                                     | White    | 31  | F      | LEV, LTG              | Venlafaxine 1.50mg/L, caffeine,<br>Venlafaxine Metabolite                                                                                                                                |                                                                                                |
| SUDEP                             | SUDEP                                                     | Black    | 54  | M      | GBP, PHT              | Delta 9-Carboxy THC 70ng/ML &<br>Delta 9 THC 15ng/ML, cotinine,<br>caffeine, nicotine                                                                                                    | Intracranial<br>atherosclerosis                                                                |
| SUDEP                             | SUDEP                                                     | White    | 27  | F      | VPA, LEV              | nicotine                                                                                                                                                                                 |                                                                                                |
| SUDEP                             | SUDEP                                                     | Hispanic | 43  | M      | CBZ                   | nicotine, Carbamazepine-10 11<br>Epoxide 2.4mg/L, Carbamazepine<br>10mg/L, caffeine                                                                                                      |                                                                                                |
| SUDEP                             | Cardiac<br>hypertensive<br>disease                        | White    | 52  | M      | PHT                   | Delta 9-THC <1ng/ml & Delta 9-<br>Carboxy THC +                                                                                                                                          | LVH, HTN, Early<br>Repolarization                                                              |
| SUDEP                             | SUDEP                                                     | Hispanic | 48  | F      | LEV, PHT              | Delta 9-Carboxy 8ng/ml, Phenytoin<br>4.2mg/L                                                                                                                                             | Brain Abscess,<br>Cerebellar atrophy                                                           |
| SUDEP                             | SUDEP                                                     | Black    | 67  | F      | PHT                   |                                                                                                                                                                                          | A-fib, Anemia,<br>cancer (colon),<br>bowel obstruction,<br>pleural effusion s/p<br>thoracotomy |
| SUDEP                             | Cardiomyopathy<br>Non-ischemic/<br>Dilated/<br>Idiopathic | White    | 29  | M      | CBZ                   | delta 9-Carboxy THC 6.6ng/ml,<br>Carbamazepine -10 11 epoxide<br>1.1mg/ml, carbamazepine 3.7 mg/L,<br>Delta 9-THC 1ng/ml, caffeine                                                       | Hepatitis B,<br>hepatitis A                                                                    |
| Possible<br>SUDEP                 | Incarcerated<br>hernia                                    | White    | 61  | M      | LEV                   |                                                                                                                                                                                          | Cancer (leukemia)                                                                              |
| Possible<br>SUDEP                 | Chemical<br>overdose                                      | White    | 50  | M      | DZP, GBP,<br>PGB, PHB | pseudoephedrine 760ng/ml,<br>oxazepam 7ng/ml, nordiazepam 344<br>ng/ml, norpseudoephedrine 34 ng/ml,<br>diazepam 270 ng/ml, gabapentin 2.5<br>mg/ml, PHB 1.5 mg/L, morphine 0.36<br>mg/L | GERD                                                                                           |
| Possible<br>SUDEP                 | Hypertrophic<br>cardiomyopathy                            | White    | 64  | M      | PHT, PHB              | Phenobarbital 15 mg/L                                                                                                                                                                    | CVA/Stroke, LVH,<br>PAC's                                                                      |

|                           |                                     |          |    |   |          |                                                                                                                                                                                     |                                                                                                                     |
|---------------------------|-------------------------------------|----------|----|---|----------|-------------------------------------------------------------------------------------------------------------------------------------------------------------------------------------|---------------------------------------------------------------------------------------------------------------------|
| Possible SUDEP            | Non-cardiac chemical overdose       | Black    | 53 | F | VPA      | benzoylecgonine .17mg/l, valproic acid 17mg/l, citalopram 1mg/l, quetiapine 0.91mg/l, temazepam 0.79mg/l, Delta 9- carboxy THC 0.79mg/l, morphine 0.14 mg/l, amitriptyline 0.14mg/l | COPD, CVA/Stroke, Hepatitis C , pneumonia                                                                           |
| Possible SUDEP            | Cardiomyopathy<br>Alcoholic         | White    | 66 | M | PHT      |                                                                                                                                                                                     | A-fib, anemia, CAD, CKD, Stroke, Hepatitis B, Hepatitis C, HTN, MI, chronic pancreatitis                            |
| Possible SUDEP            | Acute CAD<br>Acute coronary lesions | White    | 41 | M | Unknown  | Delta 9-carboxy THC 22ng/ml, Delta 9-THC 12ng/ML, nictoine/continine +, Caffeine+                                                                                                   |                                                                                                                     |
| Possible SUDEP            | Hypertensive heart disease          | White    | 79 | F | LZP      |                                                                                                                                                                                     | Stroke, HTN, LVH, TIA, dementia                                                                                     |
| Possible SUDEP            | Chronic coronary lesions            | Black    | 72 | M | LTG, LEV | lamotrigine 3.6mg/L, Levetiracetam 14mg/l, chloroheniramine <0.05mg/l, Dextromethorphan <0.05mg/L                                                                                   | Angina, cancer (prostate), CKD, DM, Dyslipidemia, HTN, ARF                                                          |
| Possible SUDEP            | Hypertensive heart disease          | Hispanic | 92 | F | OXC      |                                                                                                                                                                                     | heart block, A-tach, aortic and mitral regurgitation, CAD, CKD, HTN, Stroke, LVH, MI, Vascular disease, Alzheimer's |
| Possible SUDEP            | Acromegaly<br>Cardiomyopathy        | White    | 63 | M | None     | Delta 9-THC 9ng/ml, Delta 9-carboxy THC 60ng/ml,& 11 Hydroxy Delta 9 1ng/ml                                                                                                         | A-Fib, Cancer (acromegaly 2/2 pituitary macroadenoma), Hypotension, panhypopituitarism, acromegaly                  |
| Acute symptomatic seizure | Acute alcohol withdrawal            | Black    | 52 | M | None     |                                                                                                                                                                                     | Anemia, Cancer(renal), LVH, MI, degenerative joint disease                                                          |

|                           |                               |          |    |   |                       |                                                                                                                                                                                                        |                                                                                                                                                        |
|---------------------------|-------------------------------|----------|----|---|-----------------------|--------------------------------------------------------------------------------------------------------------------------------------------------------------------------------------------------------|--------------------------------------------------------------------------------------------------------------------------------------------------------|
| Acute symptomatic seizure | Cardiomyopathy - Alcoholic    | Asian    | 41 | M | LZP, chlordiazepoxide | Methanol <10mg/dl, methadone <10mg/dl, ethanol 0.02%, nicotine/continine +, nicotine, caffeine +                                                                                                       | Hepatitis B                                                                                                                                            |
| Acute symptomatic seizure | Non-Cardiac chemical overdose | White    | 58 | M | GBP                   | Ethanol 0.26%, Nordiazepam 0.05mg/l, continine +, caffeine +,                                                                                                                                          | CAD, COPD, Hepatitis B, HTN, MI, other Hematopoetic, PAD, cerebral palsy                                                                               |
| Acute symptomatic seizure | Hypertensive Heart Disease    | Asian    | 73 | M | Unknown               |                                                                                                                                                                                                        | Dyslipidemia, HTN, RBBB                                                                                                                                |
| Acute symptomatic seizure | Cardiomyopathy Alcoholic      | Hispanic | 55 | M | LZP                   | acetone <10, Chlordiazepoxide 0.14mg/l, nordiazepam 0.09 mg/l, caffeine +                                                                                                                              | A-fib, Anemia, CAD, Cardiomegaly, cardiomyopathy, CHF, hepatitis C, HTN, liver disease, lung disease, LVH, pneumonia, TB, CHF, tricuspid regurgitation |
| Not SUDEP                 | Non-Cardiac chemical overdose | White    | 62 | F | LZP, GBP, CLZ         | desalkylflurazepam 83 ng/ml, hydroxyethylflurazepam 6ng/ml, flurazepam 4ng/ml, 7 ammino clonazepam 33ng/ml, delta 9 carboxy THC 15 ng/ml, oxymorphone 10ng/ml, trazodone 1.8mg/ml, oxycodone 0.30mg/ml | Asthma, COPD, Dyslipidemia, HTN, Hypothyroidism                                                                                                        |
| Not SUDEP                 | Non-Cardiac chemical overdose | White    | 51 | M | None                  | Delta 9-Carboxy THC 19ng/ml, Methadone 1.56mg/l, delta 9-thc <1ng/ml, 11 hydroxy Delta 9-THC <1ng/ml, Ethanol 0.25%, Diphenhydramine 0.19mg/l, Methadone metabolite +                                  | thrombocytopenia                                                                                                                                       |
| Not SUDEP                 | Infection Pneumonia           | Hispanic | 76 | M | PHT, GBP              | gabapentin 73mg/l, morphine 0.36mg/l, nicotine +, desipramine +                                                                                                                                        | anemia, cardiomyopathy, dyslipidemia, hepatitis C, HTN, MI, heart block, Meningitis with                                                               |

|           |                                                  |          |    |   |          |                                                                                                   |                                                                                                                               |
|-----------|--------------------------------------------------|----------|----|---|----------|---------------------------------------------------------------------------------------------------|-------------------------------------------------------------------------------------------------------------------------------|
|           |                                                  |          |    |   |          |                                                                                                   | cognitive impairment                                                                                                          |
| Not SUDEP | Pulmonary Embolism                               | White    | 67 | M | Unknown  |                                                                                                   | A-Fib, CAD (prior MI), HTN, NSVT, RBBB                                                                                        |
| Not SUDEP | Cardiomyopathy Non-ischemic/ Dilated/ Idiopathic | Black    | 49 | F | Unknown  | Risperidone 4.3ng/ML, 9-Hydroxyrisperidone 4.3 ng/ml, diphenhydramine 0.12 mg/l, Caffeine +       | Stroke, TIA                                                                                                                   |
| Not SUDEP | Non-Cardiac chemical overdose                    | Black    | 57 | F | GBP      | Delta 9-Carboxy THC <1ng/ml, Benzoylcegonine 0.96mg/l, Methadone 0.40mg/l, methadone Metabolite + | Asthma, hepatitis C, HIV/AIDS, HTN,                                                                                           |
| Not SUDEP | Non-Cardiac Asphyxia due to food bolus           | Hispanic | 57 | M | Unknown  | Methadone 1.66mg/l, Ethanol 0.28%, Venlafaxine 0.05mg/L, Cotinine +, Methadone Metabolite +       | COPD, Stroke, TBI, dementia                                                                                                   |
| Not SUDEP | Pulmonary artery dissection                      | White    | 57 | F | CBZ, PHT | phenytoin 2.9mg/l, Carbamazepine 2.0 mg/L, carbamazepine-10, 11 Epoxide 0.34 mg/L                 | Anemia, Aortic aneurysm, Aortic insufficiency, LVH, Mitral regurgitation, valvular disease, syncope, TBI, developmental delay |
| Not SUDEP | Acute CAD Myocardial Rupture                     | White    | 68 | M | PHT      | phenytoin 0.98mg/l                                                                                | Asthma, CAD, Prostate Cancer, Dyslipidemia, Gout, HTN, goiter, hyperglycemia, sleep apnea, obesity                            |
| Not SUDEP | Pulmonary Embolism                               | White    | 57 | F | None     | Delta 9-thc 8ng/ML & Delta 9-carboxy THC 41ng/ml                                                  | PAD, PE                                                                                                                       |
| Not SUDEP | Chronic CAD Healed MI                            | White    | 87 | M | None     | Mirtazapine 0.07mg/l                                                                              | A-fib, A-tach, GERD, gout, Hepatitis B, HTN, MI, Pacemaker implant, prostatic                                                 |

|           |                               |       |    |   |          |                         |                                                                                                          |
|-----------|-------------------------------|-------|----|---|----------|-------------------------|----------------------------------------------------------------------------------------------------------|
|           |                               |       |    |   |          |                         | Hypertrophy, heart block                                                                                 |
| Not SUDEP | Chronic CAD Ischemic CM       | White | 82 | M | Unknown  |                         | heart block, CAD, Cancer (basal cell carcinoma), COPD, Stroke, dyslipidemia, HTN, MI, acute pancreatitis |
| Not SUDEP | Chronic CAD healed MI         | Other | 60 | M | Unknown  | Caffeine +              |                                                                                                          |
| Not SUDEP | Pulmonary Embolism            | White | 43 | M | PHT, LZP | continine +, Caffeine + | Unknown                                                                                                  |
| Not SUDEP | Intracranial Hemorrhage       | Black | 70 | F | PHB, PHT | volatiles 0             | Aortic Stenosis, GERD, Early Repolarization, HTN, mitral regurgitation, diverticulitis s/p hemicolectomy |
| Not SUDEP | Non-cardiac: Other Hemorrhage | Other | 52 | M | None     |                         | A-fib, CHF, HTN, other respiratory (sleep apnea)                                                         |

A-fib: atrial fibrillation, A-tach: atrial tachycardia, CAD: coronary artery disease, CBZ: carbamazepine, CHF: congestive heart failure, CKD: chronic kidney disease, CLZ: clonazepam, CM: cardiomyopathy, COPD: chronic obstructive pulmonary disease, DZP: diazepam, GBP: gabapentin, GERD: gastroesophageal reflux disease, HTN: hypertension, LEV: levetiracetam, LVH: left ventricular hypertrophy, LZP: lorazepam, LTG: lamotrigine, MI: myocardial infarction, NSVT: non-sustained ventricular tachycardia, OXC: oxcarbazepine, PAD: peripheral artery disease, PGB: pregabalin, PHT: phenytoin, RBBB: right bundle branch block, TBI: traumatic brain injury, TIA: transient ischemic attack, VPA: valproate
